# Supplementary material
Source: publisher site journal article supplement (https://www.dovepress.com/article/604901)
Supplement: Supplementary file 1 [file 604901%20Revised%20Supplementary%20Material.pdf]

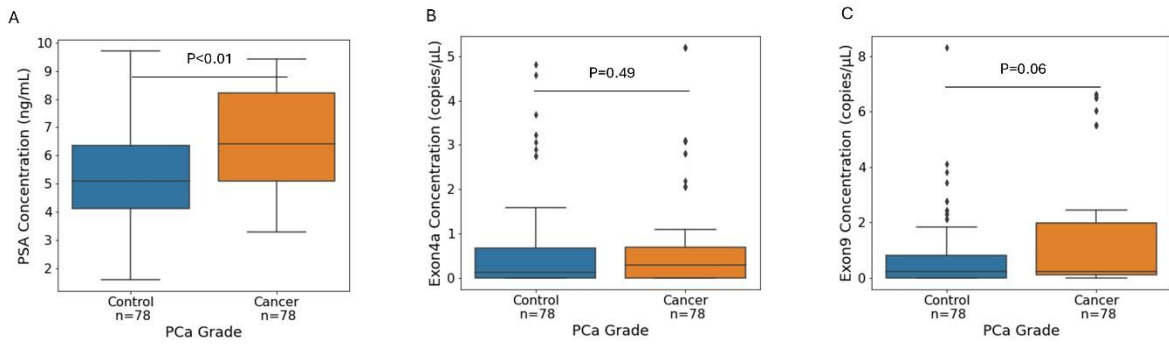

**Figure S1.** Supplementary figure showing balanced clinical distribution in copy numbers of PVT1 exon 4A, PVT1 exon 9 and the concentration of PSA ( $\frac{ng}{mL}$ ) obtained from serum of health men or men with low-grade PCa (control) and men with high-grade prostate cancer (Cancer). Copy numbers are derived from multiplex digital PCR assay. A) Concentration of PSA and B) copy numbers of PVT1 Exon 4a, C) copy numbers of PVT1 Exon 9.
